# Supplementary material for: Effectiveness of COVID-19 Vaccines against SARS-CoV-2 Omicron Variant (B.1.1.529): A Systematic Review with Meta-Analysis and Meta-Regression
Source: MDPI journal article supplement (doi:10.3390/vaccines10122180), 2022-12-19

# SUPPLEMENTARY MATERIALS

## Contents

|                                                                                                                |    |
|----------------------------------------------------------------------------------------------------------------|----|
| S.1. Literature Search .....                                                                                   | 2  |
| The Keywords .....                                                                                             | 2  |
| The Search Results .....                                                                                       | 2  |
| Table S1. Results of systematic searches. ....                                                                 | 2  |
| S.2. Assessment of Quality of Study.....                                                                       | 3  |
| Table S2. The assessment of quality of study for cohort studies using Newcastle-Ottawa Scale (NOS) .....       | 3  |
| Table S3. The assessment of quality of study for case-control studies using Newcastle-Ottawa Scale (NOS) ..... | 5  |
| S.3. Summary of outcomes for full dose .....                                                                   | 7  |
| Table S4. Summary of outcomes for full dose .....                                                              | 7  |
| S.4. Summary of outcomes for booster dose.....                                                                 | 11 |
| Table S5. Summary of outcomes for booster dose .....                                                           | 11 |
| S.5. Summary of outcomes for booster vs. full dose of the within 3 months or more model                        | 14 |
| Table S6. Summary of outcomes for booster vs. full dose of the within 3 months or more model.....              | 14 |
| S.6. Summary of outcomes for booster vs. full dose of the within 3 months model.....                           | 15 |
| Table S7. Summary of outcomes for booster vs. full dose of the within 3 months model .                         | 15 |
| Figure S1. Sensitivity Analysis for Any Infection Endpoints of 0 to 3 Months Model .....                       | 17 |
| Figure S2. Sensitivity Analysis for Symptomatic Infection Endpoints of 0 to 3 Months Model .....               | 18 |
| Figure S3. Sensitivity Analysis for Severe Infection Endpoints of 0 to 3 Months Model .....                    | 19 |
| Figure S4. Sensitivity Analysis for Any Infection Endpoints of 0 to 3 Months or More Model                     | 20 |
| Figure S5. Sensitivity Analysis for Symptomatic Infection Endpoints of 0 to 3 Months or More Model .....       | 21 |
| Figure S6. Sensitivity Analysis for Severe Infection Endpoints of 0 to 3 Months or More Model .....            | 22 |

## S.1. Literature Search

### The Keywords

#1 (SARS-CoV-2) OR (COVID-19)

#2 (Omicron) OR (B.1.1.529)

#3 (Vaccine) OR (Vaccination)

#4 (Vaccine efficacy) OR (Vaccine effectiveness)

### The Search Results

Table S1. Results of systematic searches.

| Database             | Keywords                | Search Result | Search-time                  |
|----------------------|-------------------------|---------------|------------------------------|
| PubMed               | #1 AND #2 AND #3 AND #4 | 121           | April 6 <sup>th</sup> , 2022 |
| ScienceDirect        | #1 AND #2 AND #3 AND #4 | 475           | April 6 <sup>th</sup> , 2022 |
| CENTRAL              | #1 AND #2 AND #3 AND #4 | 2             | April 6 <sup>th</sup> , 2022 |
| Web of Science       | #1 AND #2 AND #3 AND #4 | 61            | April 6 <sup>th</sup> , 2022 |
| Scopus               | #1 AND #2 AND #3 AND #4 | 619           | April 6 <sup>th</sup> , 2022 |
| medRxiv              | #1 AND #2 AND #3 AND #4 | 455           | April 6 <sup>th</sup> , 2022 |
| bioRxiv              | #1 AND #2 AND #3 AND #4 | 312           | April 6 <sup>th</sup> , 2022 |
| Bibliographic search | -                       | 19            | April 6 <sup>th</sup> , 2022 |

## S.2. Assessment of Quality of Study

Table S2. The assessment of quality of study for cohort studies using Newcastle-Ottawa Scale (NOS)

| NOS of Cohort Study                                                          |                         |                             |                         |                          |
|------------------------------------------------------------------------------|-------------------------|-----------------------------|-------------------------|--------------------------|
| Components                                                                   | Hansen et al.<br>(2021) | Abu-Raddad et al.<br>(2022) | Monge et al.,<br>(2022) | Fowlkes et al.<br>(2022) |
| <b>Selection</b>                                                             |                         |                             |                         |                          |
| Representativeness of the exposed cohort                                     | *                       | *                           | *                       | *                        |
| Selection of the non-exposed cohort                                          | *                       | *                           | *                       | *                        |
| Ascertainment of exposure                                                    | *                       | *                           | *                       | *                        |
| Demonstration that outcome of interest was not present at start of the study | *                       | *                           | -                       | -                        |
| <b>Comparability</b>                                                         |                         |                             |                         |                          |
| Comparability of cohorts on the basis of design or analysis                  | *                       | **                          | *                       | *                        |
| <b>Exposure</b>                                                              |                         |                             |                         |                          |
| Assessment of outcome                                                        | *                       | *                           | *                       | *                        |

|                                                   |      |      |      |      |
|---------------------------------------------------|------|------|------|------|
| Enough follow-up time length for outcome to occur | *    | *    | *    | *    |
| Adequacy of follow-up of cohorts                  | *    | *    | *    | *    |
| <b>Study Quality</b>                              |      |      |      |      |
| <b>Total Score</b>                                | 8    | 9    | 7    | 7    |
| <b>Interpretation</b>                             | Good | Good | Good | Good |

Table S3. The assessment of quality of study for case-control studies using Newcastle-Ottawa Scale (NOS)

| NOS of Case-Control Study |                                  |                                 |                       |                        |                                                                            |                           |                                                     |                   |               |                |
|---------------------------|----------------------------------|---------------------------------|-----------------------|------------------------|----------------------------------------------------------------------------|---------------------------|-----------------------------------------------------|-------------------|---------------|----------------|
| Components                | Selection                        |                                 |                       |                        | Comparability                                                              |                           | Exposure                                            |                   | Study Quality |                |
|                           | Is the case definition adequate? | Representativeness of the cases | Selection of controls | Definition of controls | Comparability of cases and controls on the basis of the design or analysis | Ascertainment of exposure | Same method of ascertainment for cases and controls | Non-response rate | Total Score   | Interpretation |
| Buchan et al. (2021)      | *                                | *                               | *                     | *                      | *                                                                          | -                         | *                                                   | *                 | 7             | Good           |
| Gray et al. (2021)        | *                                | *                               | *                     | *                      | *                                                                          | *                         | *                                                   | *                 | 8             | Good           |
| Accorsi et al. (2022)     | *                                | *                               | *                     | *                      | *                                                                          | -                         | *                                                   | *                 | 7             | Good           |
| Andrews et al. (2022)     | *                                | *                               | *                     | *                      | *                                                                          | *                         | *                                                   | *                 | 8             | Good           |
| Chemaitelly et al. (2022) | *                                | *                               | *                     | *                      | *                                                                          | *                         | *                                                   | *                 | 8             | Good           |
| Collie et al. (2022)      | *                                | *                               | *                     | *                      | *                                                                          | *                         | *                                                   | *                 | 8             | Good           |
| Ferdinand et al. (2022)   | *                                | *                               | *                     | *                      | *                                                                          | *                         | *                                                   | *                 | 8             | Good           |
| Klein et al. (2022)       | *                                | *                               | *                     | *                      | *                                                                          | *                         | *                                                   | *                 | 8             | Good           |
| Lauring et al. (2022)     | *                                | *                               | *                     | *                      | **                                                                         | *                         | *                                                   | *                 | 9             | Good           |
| Natarajan et al. (2022)   | *                                | *                               | *                     | *                      | **                                                                         | *                         | *                                                   | *                 | 9             | Good           |
| Tartof et al. (2022)      | *                                | *                               | *                     | *                      | *                                                                          | *                         | *                                                   | *                 | 8             | Good           |
| Tenforde et al. (2022)    | *                                | *                               | *                     | *                      | *                                                                          | -                         | *                                                   | *                 | 7             | Good           |

|                        |   |   |   |   |    |   |   |   |   |      |
|------------------------|---|---|---|---|----|---|---|---|---|------|
| Thompson et al. (2022) | * | * | * | * | *  | * | * | * | 8 | Good |
| Tseng et al. (2022)    | * | * | * | * | ** | * | * | * | 9 | Good |
| Young-Xu et al. (2022) | * | * | * | * | *  | * | * | * | 8 | Good |
| Zambrano et al. (2022) | * | * | * | * | *  | * | * | * | 8 | Good |

### S.3. Summary of outcomes for full dose

Table S4. Summary of outcomes for full dose

| Study                   | Endpoints             | Vaccine         | Study Design | Days Latitude | Follow-up Interval | VE (95%CI)             |
|-------------------------|-----------------------|-----------------|--------------|---------------|--------------------|------------------------|
| Ferdinand et al. (2022) | Severe infection      | Any mRNA        | Case-control | 60            | 0 to 2 months      | 71% (51% to 83%)       |
| Ferdinand et al. (2022) | Severe infection      | Any mRNA        | Case-control | 90            | 2 to 3 months      | 65% (53% to 74%)       |
| Ferdinand et al. (2022) | Severe infection      | Any mRNA        | Case-control | 120           | 3 to 4 months      | 58% (38% to 71%)       |
| Ferdinand et al. (2022) | Severe infection      | Any mRNA        | Case-control | 150           | 5+ months          | 54% (48% to 59%)       |
| Ferdinand et al. (2022) | Symptomatic Infection | Any mRNA        | Case-control | 60            | 0 to 2 months      | 69% (62% to 75%)       |
| Ferdinand et al. (2022) | Symptomatic Infection | Any mRNA        | Case-control | 90            | 2 to 3 months      | 50% (45% to 55%)       |
| Ferdinand et al. (2022) | Symptomatic Infection | Any mRNA        | Case-control | 120           | 3 to 4 months      | 48% (41% to 54%)       |
| Ferdinand et al. (2022) | Symptomatic Infection | Any mRNA        | Case-control | 150           | 5+ months          | 37% (34% to 40%)       |
| Klein et al. (2022)     | Symptomatic infection | BNT162b2        | Case-control | 149           | 14 to 149 days     | 34% (8% to 53%)        |
| Klein et al. (2022)     | Symptomatic infection | BNT162b2        | Case-control | 299           | 150+ days          | -3% (-30% to 18%)      |
| Klein et al. (2022)     | Symptomatic infection | BNT162b2        | Case-control | 149           | 14 to 149 days     | 45% (30% to 57%)       |
| Klein et al. (2022)     | Symptomatic infection | BNT162b2        | Case-control | 299           | 150+ days          | -2% (-25% to 17%)      |
| Klein et al. (2022)     | Symptomatic infection | BNT162b2        | Case-control | 67            | 14 to 67 days      | 51% (30% to 65%)       |
| Natarajan et al. (2022) | Severe infection      | AD26.COV2S      | Case-control | 120           | 14+ days           | 31% (21% to 40%)       |
| Natarajan et al. (2022) | Symptomatic Infection | AD26.COV2S      | Case-control | 120           | 14+ days           | 24% (18% to 29%)       |
| Tenforde et al. (2022)  | Severe infection      | Any mRNA        | Case-control | 256           | 256 days (median)  | 79% (66% to 87%)       |
| Zambrano et al. (2022)  | Severe Infection      | BNT162b2        | Case-control | 63            | 63 days (median)   | 90% (75% to 96%)       |
| Andrews et al. (2022)   | Symptomatic Infection | ChAdOx1 nCov-19 | Case-control | 28            | 2 to 4 weeks       | 48.9% (39.2% to 57.1%) |
| Andrews et al. (2022)   | Symptomatic Infection | ChAdOx1 nCov-19 | Case-control | 70            | 5 to 9 weeks       | 33.7% (25% to 41.5%)   |
| Andrews et al. (2022)   | Symptomatic Infection | ChAdOx1 nCov-19 | Case-control | 105           | 10 to 14 weeks     | 28.6% (20.9% to 35.6%) |
| Andrews et al. (2022)   | Symptomatic Infection | ChAdOx1 nCov-19 | Case-control | 140           | 15 to 19 weeks     | 17.8% (13.4% to 21.9%) |
| Andrews et al. (2022)   | Symptomatic Infection | ChAdOx1 nCov-19 | Case-control | 175           | 20 to 24 weeks     | 4% (1.9% to 6.1%)      |
| Andrews et al. (2022)   | Symptomatic Infection | ChAdOx1 nCov-19 | Case-control | 210           | 25+ weeks          | -2.7% (-4.2% to -1.2%) |
| Andrews et al. (2022)   | Symptomatic Infection | BNT162b2        | Case-control | 28            | 2 to 4 weeks       | 65.5% (63.9% to 67%)   |
| Andrews et al. (2022)   | Symptomatic Infection | BNT162b2        | Case-control | 70            | 5 to 9 weeks       | 48.7% (47.1% to 50.2%) |
| Andrews et al. (2022)   | Symptomatic Infection | BNT162b2        | Case-control | 105           | 10 to 14 weeks     | 30.1% (28.7% to 31.5%) |

|                           |                       |           |              |     |                 |                           |
|---------------------------|-----------------------|-----------|--------------|-----|-----------------|---------------------------|
| Andrews et al. (2022)     | Symptomatic Infection | BNT162b2  | Case-control | 140 | 15 to 19 weeks  | 15.4% (14.2% to 16.6%)    |
| Andrews et al. (2022)     | Symptomatic Infection | BNT162b2  | Case-control | 175 | 20 to 24 weeks  | 11.5% (10.1% to 12.9%)    |
| Andrews et al. (2022)     | Symptomatic Infection | BNT162b2  | Case-control | 210 | 25+ weeks       | 8.8% (7% to 10.5%)        |
| Andrews et al. (2022)     | Symptomatic Infection | mRNA-1273 | Case-control | 28  | 2 to 4 weeks    | 75.1% (70.8% to 78.7%)    |
| Andrews et al. (2022)     | Symptomatic Infection | mRNA-1273 | Case-control | 70  | 5 to 9 weeks    | 52.8% (48.2% to 57.1%)    |
| Andrews et al. (2022)     | Symptomatic Infection | mRNA-1273 | Case-control | 105 | 10 to 14 weeks  | 35.6% (32.7% to 38.4%)    |
| Andrews et al. (2022)     | Symptomatic Infection | mRNA-1273 | Case-control | 140 | 15 to 19 weeks  | 25.3% (23.2% to 27.4%)    |
| Andrews et al. (2022)     | Symptomatic Infection | mRNA-1273 | Case-control | 175 | 20 to 24 weeks  | 15% (11.6% to 18.2%)      |
| Andrews et al. (2022)     | Symptomatic Infection | mRNA-1273 | Case-control | 210 | 25+ weeks       | 14.9% (3.9% to 24.7%)     |
| Buchan et al. (2021)      | Symptomatic Infection | Any mRNA  | Case-control | 59  | 7 to 59 days    | 36% (24% to 45%)          |
| Buchan et al. (2021)      | Symptomatic Infection | Any mRNA  | Case-control | 119 | 60 to 119 days  | 12% (3% to 21%)           |
| Buchan et al. (2021)      | Symptomatic Infection | Any mRNA  | Case-control | 179 | 120 to 179 days | 15% (8% to 22%)           |
| Buchan et al. (2021)      | Symptomatic Infection | Any mRNA  | Case-control | 239 | 180 to 239 days | 1% (-8% to 10%)           |
| Buchan et al. (2021)      | Symptomatic Infection | Any mRNA  | Case-control | 299 | 240+ days       | 2% (-17% to 17%)          |
| Buchan et al. (2021)      | Severe infection      | Any mRNA  | Case-control | 59  | 7 to 59 days    | 55% (-106% to 90%)        |
| Buchan et al. (2021)      | Severe infection      | Any mRNA  | Case-control | 119 | 60 to 119 days  | 37% (-71% to 77%)         |
| Buchan et al. (2021)      | Severe infection      | Any mRNA  | Case-control | 179 | 120 to 179 days | 75% (51% to 87%)          |
| Buchan et al. (2021)      | Severe infection      | Any mRNA  | Case-control | 239 | 180 to 239 days | 82% (62% to 91%)          |
| Buchan et al. (2021)      | Severe infection      | Any mRNA  | Case-control | 299 | 240+ days       | 86% (-12% to 98%)         |
| Chemaitelly et al. (2022) | Symptomatic Infection | BNT162b2  | Case-control | 30  | 0 to 1 month    | 61.9% (49.9% to 71.1%)    |
| Chemaitelly et al. (2022) | Symptomatic Infection | BNT162b2  | Case-control | 60  | 1 to 2 months   | 45.9% (33.8% to 55.8%)    |
| Chemaitelly et al. (2022) | Symptomatic Infection | BNT162b2  | Case-control | 90  | 2 to 3 months   | 36.3% (25.1% to 45.8%)    |
| Chemaitelly et al. (2022) | Symptomatic Infection | BNT162b2  | Case-control | 120 | 3 to 4 months   | 28.5% (18% to 37.8%)      |
| Chemaitelly et al. (2022) | Symptomatic Infection | BNT162b2  | Case-control | 150 | 4 to 5 months   | 10.6% (-2.3% to 21.9%)    |
| Chemaitelly et al. (2022) | Symptomatic Infection | BNT162b2  | Case-control | 180 | 5 to 6 months   | 14.3% (6.2% to 21.8%)     |
| Chemaitelly et al. (2022) | Symptomatic Infection | BNT162b2  | Case-control | 210 | 6 to 7 months   | 9.6% (2.4% to 16.3%)      |
| Chemaitelly et al. (2022) | Symptomatic Infection | BNT162b2  | Case-control | 240 | 7 to 8 months   | -7.5% (-15.3% to -0.2%)   |
| Chemaitelly et al. (2022) | Symptomatic Infection | BNT162b2  | Case-control | 270 | 8 to 9 months   | 1.5% (-6.2% to 8.7%)      |
| Chemaitelly et al. (2022) | Symptomatic Infection | BNT162b2  | Case-control | 300 | 9 to 10 months  | -17.7% (-25.6% to -10.3%) |
| Chemaitelly et al. (2022) | Symptomatic Infection | BNT162b2  | Case-control | 330 | 10 to 11 months | -0.3% (-10.2% to 8.6%)    |



|                           |                       |           |              |     |                 |                          |
|---------------------------|-----------------------|-----------|--------------|-----|-----------------|--------------------------|
| Chemaitelly et al. (2022) | Symptomatic Infection | BNT162b2  | Case-control | 360 | 11+ months      | 16.5% (3.1% to 28.1%)    |
| Chemaitelly et al. (2022) | Symptomatic Infection | mRNA-1273 | Case-control | 120 | 1 to 3 months   | 44.8% (16% to 63.8%)     |
| Chemaitelly et al. (2022) | Symptomatic Infection | mRNA-1273 | Case-control | 180 | 4 to 6 months   | 20.8% (13.7% to 27.4%)   |
| Chemaitelly et al. (2022) | Symptomatic Infection | mRNA-1273 | Case-control | 240 | 7+ months       | -9.3% (-16.3% to -2.8%)  |
| Chemaitelly et al. (2022) | Severe infection      | mRNA-1273 | Case-control | 180 | 1 to 6 months   | 76.9% (19.2% to 93.4%)   |
| Chemaitelly et al. (2022) | Severe infection      | mRNA-1273 | Case-control | 360 | 7+ months       | 64% (39.1% to 78.7%)     |
| Chemaitelly et al. (2022) | Severe infection      | BNT162b2  | Case-control | 180 | 1 to 6 months   | 73.7% (46.8% to 87%)     |
| Chemaitelly et al. (2022) | Severe infection      | BNT162b2  | Case-control | 360 | 7+ months       | 80.7% (71.3% to 87%)     |
| Tartof et al. (2022)      | Severe Infection      | BNT162b2  | Case-control | 90  | 0 to 3 months   | 70% (41% to 84%)         |
| Tartof et al. (2022)      | Severe Infection      | BNT162b2  | Case-control | 180 | 3 to 6 months   | 67% (44% to 80%)         |
| Tartof et al. (2022)      | Severe Infection      | BNT162b2  | Case-control | 270 | 6+ months       | 68% (56% to 76%)         |
| Tartof et al. (2022)      | Symptomatic Infection | BNT162b2  | Case-control | 90  | 0 to 3 months   | 60% (43% to 72%)         |
| Tartof et al. (2022)      | Symptomatic Infection | BNT162b2  | Case-control | 180 | 3 to 6 months   | 38% (21% to 51%)         |
| Tartof et al. (2022)      | Symptomatic Infection | BNT162b2  | Case-control | 270 | 6+ months       | 41% (32% to 50%)         |
| Thompson et al. (2022)    | Symptomatic Infection | Any mRNA  | Case-control | 180 | 14 to 179 days  | 52% (46% to 58%)         |
| Thompson et al. (2022)    | Symptomatic Infection | Any mRNA  | Case-control | 360 | 180+ days       | 38% (32% to 43%)         |
| Thompson et al. (2022)    | Severe Infection      | Any mRNA  | Case-control | 179 | 14 to 179 days  | 81% (65% to 90%)         |
| Thompson et al. (2022)    | Severe Infection      | Any mRNA  | Case-control | 359 | 180+ days       | 57% (39% to 70%)         |
| Tseng et al. (2022)       | Positive Covid-19     | mRNA-1273 | Case-control | 90  | 14 to 90 days   | 44% (35.1% to 51.6%)     |
| Tseng et al. (2022)       | Positive Covid-19     | mRNA-1273 | Case-control | 180 | 91 to 180 days  | 23.5% (16.4% to 30%)     |
| Tseng et al. (2022)       | Positive Covid-19     | mRNA-1273 | Case-control | 270 | 181 to 270 days | 13.8% (10.2% to 17.3%)   |
| Tseng et al. (2022)       | Positive Covid-19     | mRNA-1273 | Case-control | 365 | 271 to 365 days | 5.9% (0.4% to 11%)       |
| Fowlkes et al. (2022)     | Positive Covid-19     | BNT162b2  | Cohort       | 82  | 14 to 82 days   | 31% (9% to 48%)          |
| Fowlkes et al. (2022)     | Positive Covid-19     | BNT162b2  | Cohort       | 149 | 14 to 149 days  | 59% (22% to 79%)         |
| Fowlkes et al. (2022)     | Positive Covid-19     | BNT162b2  | Cohort       | 299 | 150+ days       | 62% (-28% to 89%)        |
| Hansen et al. (2021)      | Positive Covid-19     | BNT162b2  | Cohort       | 30  | 1 to 30 days    | 55.2% (23.5% to 73.7%)   |
| Hansen et al. (2021)      | Positive Covid-19     | BNT162b2  | Cohort       | 60  | 31 to 60 days   | 16.1% (-20.8% to 41.7%)  |
| Hansen et al. (2021)      | Positive Covid-19     | BNT162b2  | Cohort       | 90  | 61 to 90 days   | 9.8% (-10% to 26.1%)     |
| Hansen et al. (2021)      | Positive Covid-19     | BNT162b2  | Cohort       | 150 | 91 to 150 days  | -76.2% (-95.3% to 59.5%) |
| Hansen et al. (2021)      | Positive Covid-19     | mRNA-1273 | Cohort       | 30  | 1 to 30 days    | 36.7% (-69.9% to 76.4%)  |

|                      |                   |           |        |     |                |                        |
|----------------------|-------------------|-----------|--------|-----|----------------|------------------------|
| Hansen et al. (2021) | Positive Covid-19 | mRNA-1273 | Cohort | 60  | 31 to 60 days  | 30% (-41.3% to 65.4%)  |
| Hansen et al. (2021) | Positive Covid-19 | mRNA-1273 | Cohort | 90  | 61 to 90 days  | 4.2% (-30.8% to 29.8%) |
| Hansen et al. (2021) | Positive Covid-19 | mRNA-1273 | Cohort | 150 | 91 to 150 days | 39.3% (-61.6% to -20%) |

Data whose Days Latitude are day 14 or below and NR are excluded from the meta-regression analysis

## S.4. Summary of outcomes for booster dose

Table S5. Summary of outcomes for booster dose

| Study                    | Endpoints             | Vaccine         | Study Design | Days Latitude | Follow-up Interval | VE (95%CI)             |
|--------------------------|-----------------------|-----------------|--------------|---------------|--------------------|------------------------|
| Buchan et al., 2021      | Severe infection      | Any mRNA        | Case-control | 6             | 0 to 6 days        | 91% (71% to 97%)       |
| Buchan et al., 2021      | Symptomatic Infection | Any mRNA        | Case-control | 6             | 0 to 6 days        | 36% (29% to 43%)       |
| Andrews et al., 2022     | Symptomatic Infection | BNT162b2        | Case-control | 7             | 1 week             | 66.9% (66.1% to 67.6%) |
| Andrews et al., 2022     | Symptomatic Infection | ChAdOx1 nCov-19 | Case-control | 7             | 1 week             | 57.7% (37.6% to 71.3%) |
| Andrews et al., 2022     | Symptomatic Infection | mRNA-1273       | Case-control | 7             | 1 week             | 68.1% (65.6% to 70.5%) |
| Chemaitelly et al., 2022 | Symptomatic Infection | BNT162b2        | Case-control | 7             | 1 week             | 15.8% (0.9% to 28.4%)  |
| Chemaitelly et al., 2022 | Symptomatic Infection | mRNA-1273       | Case-control | 7             | 1 week             | 3.6% (-31% to 29.1%)   |
| Gray et al., 2021        | Severe Infection      | AD26.COV2S      | Case-control | 13            | 0 to 13 days       | 63% (31% to 81%)       |
| Buchan et al., 2021      | Severe infection      | Any mRNA        | Case-control | 14            | 7+ days            | 95% (87% to 98%)       |
| Buchan et al., 2021      | Symptomatic Infection | Any mRNA        | Case-control | 14            | 7+ days            | 61% (56% to 65%)       |
| Gray et al., 2021        | Positive Covid-19     | AD26.COV2S      | Case-control | 14            | 0 to 13 days       | 31.9% (31.5% to 32.2%) |
| Chemaitelly et al., 2022 | Symptomatic Infection | BNT162b2        | Case-control | 21            | 2 to 3 weeks       | 53.6% (47.4% to 59.1%) |
| Chemaitelly et al., 2022 | Symptomatic Infection | mRNA-1273       | Case-control | 21            | 2 to 3 weeks       | 53.1% (40.7% to 62.8%) |
| Gray et al., 2021        | Severe Infection      | AD26.COV2S      | Case-control | 27            | 14 to 27 days      | 84% (67% to 92%)       |
| Gray et al., 2021        | Positive Covid-19     | AD26.COV2S      | Case-control | 28            | 14 to 27 days      | 14.4% (14% to 14.6%)   |
| Accorsi et al., 2022     | Symptomatic Infection | BNT162b2        | Case-control | 30            | 14+ days           | 65% (62% to 68%)       |
| Accorsi et al., 2022     | Symptomatic Infection | mRNA-1273       | Case-control | 30            | 14+ days           | 72% (69% to 74%)       |
| Monge et al., 2022       | Positive Covid-19     | Any mRNA        | Case-control | 34            | 7 to 34 days       | 50.4% (46% to 54.8%)   |
| Andrews et al., 2022     | Symptomatic Infection | BNT162b2        | Case-control | 35            | 2 to 4 weeks       | 67.2% (66.5% to 67.8%) |
| Andrews et al., 2022     | Symptomatic Infection | ChAdOx1 nCov-19 | Case-control | 35            | 2 to 4 weeks       | 55.6% (44.4% to 64.6%) |
| Andrews et al., 2022     | Symptomatic Infection | mRNA-1273       | Case-control | 35            | 2 to 4 weeks       | 66.3% (63.7% to 68.8%) |
| Chemaitelly et al., 2022 | Symptomatic Infection | BNT162b2        | Case-control | 42            | 4 to 5 weeks       | 56.6% (50.8% to 61.7%) |

|                          |                                        |                 |              |     |                  |                        |
|--------------------------|----------------------------------------|-----------------|--------------|-----|------------------|------------------------|
| Chemaitelly et al., 2022 | Symptomatic Infection                  | mRNA-1273       | Case-control | 42  | 4 to 5 weeks     | 54.6% (41.1% to 65%)   |
| Gray et al., 2021        | Severe Infection                       | AD26.COV2S      | Case-control | 56  | 28 to 56 days    | 85% (54% to 95%)       |
| Ferdinand et al., 2022   | Severe infection                       | Any mRNA        | Case-control | 60  | 0 to 2 months    | 91% (88% to 93%)       |
| Ferdinand et al., 2022   | Symptomatic Infection                  | Any mRNA        | Case-control | 60  | 0 to 2 months    | 87% (85% to 88%)       |
| Tenforde et al., 2022    | Severe infection                       | Any mRNA        | Case-control | 60  | 60 days (median) | 94% (88% to 97%)       |
| Tseng et al., 2022       | Positive Covid-19                      | mRNA-1273       | Case-control | 60  | 14 to 60 days    | 71.6% (69.7% to 73.4%) |
| Chemaitelly et al., 2022 | Symptomatic Infection                  | BNT162b2        | Case-control | 63  | 6 to 7 weeks     | 46.2% (39.7% to 52%)   |
| Chemaitelly et al., 2022 | Symptomatic Infection                  | mRNA-1273       | Case-control | 63  | 6+ weeks         | 38.6% (19.4% to 53.1%) |
| Klein et al., 2022       | Symptomatic Infection (Age 5-11 years) | BNT162b2        | Case-control | 67  | 14 to 67 days    | 81% (59% to 91%)       |
| Andrews et al., 2022     | Symptomatic Infection                  | BNT162b2        | Case-control | 70  | 5 to 9 weeks     | 55% (54.2% to 55.8%)   |
| Andrews et al., 2022     | Symptomatic Infection                  | ChAdOx1 nCov-19 | Case-control | 70  | 5 to 9 weeks     | 46.7% (34.3% to 56.7%) |
| Chemaitelly et al., 2022 | Symptomatic Infection                  | BNT162b2        | Case-control | 84  | 8 to 9 weeks     | 38% (28.1% to 46.5%)   |
| Gray et al., 2021        | Positive Covid-19                      | AD26.COV2S      | Case-control | 87  | 27 to 28 days    | 6.1% (5.1% to 7%)      |
| Tartof et al., 2022      | Severe infection                       | BNT162b2        | Case-control | 90  | 0 to 3 months    | 89% (83% to 92%)       |
| Tartof et al., 2022      | Symptomatic Infection                  | BNT162b2        | Case-control | 90  | 6+ months        | 78% (73% to 82%)       |
| Andrews et al., 2022     | Symptomatic Infection                  | BNT162b2        | Case-control | 105 | 10+ week         | 45.7% (44.7% to 46.7%) |
| Chemaitelly et al., 2022 | Symptomatic Infection                  | BNT162b2        | Case-control | 105 | 10 to 11 weeks   | 43.7% (32.9% to 52.7%) |
| Natarajan et al., 2022   | Severe infection                       | AD26.COV2S      | Case-control | 120 | 7 to 120 days    | 67% (52% to 77%)       |
| Natarajan et al., 2022   | Severe infection                       | Any mRNA        | Case-control | 120 | 7 to 120 days    | 89.5% (84.2% to 94.8%) |
| Natarajan et al., 2022   | Symptomatic Infection                  | AD26.COV2S      | Case-control | 120 | 7 to 120 days    | 54% (43% to 63%)       |

|                          |                       |           |              |     |               |                        |
|--------------------------|-----------------------|-----------|--------------|-----|---------------|------------------------|
| Natarajan et al., 2022   | Symptomatic Infection | Any mRNA  | Case-control | 120 | 7 to 120 days | 82.7% (80.1% to 85.3%) |
| Tseng et al., 2022       | Positive Covid-19     | mRNA-1273 | Case-control | 120 | 60+ days      | 47.4% (40.5% to 53.5%) |
| Chemaitelly et al., 2022 | Symptomatic Infection | BNT162b2  | Case-control | 126 | 12+ weeks     | 37.6% (28.8% to 45.4%) |
| Ferdinand et al., 2022   | Severe infection      | Any mRNA  | Case-control | 180 | 2 to 3 months | 88% (85% to 90%)       |
| Ferdinand et al., 2022   | Symptomatic Infection | Any mRNA  | Case-control | 180 | 2 to 3 months | 81% (79% to 82%)       |
| Tartof et al., 2022      | Severe infection      | BNT162b2  | Case-control | 180 | 3 to 5 months | 90% (57% to 98%)       |
| Tartof et al., 2022      | Symptomatic Infection | BNT162b2  | Case-control | 180 | 270+ days     | 48% (14% to 69%)       |
| Ferdinand et al., 2022   | Severe infection      | Any mRNA  | Case-control | 240 | 4+ months     | 78% (67% to 85%)       |
| Ferdinand et al., 2022   | Symptomatic Infection | Any mRNA  | Case-control | 240 | 3 to 4 months | 66% (59% to 71%)       |
| Ferdinand et al., 2022   | Symptomatic Infection | Any mRNA  | Case-control | 300 | 5+ months     | 31% (-50% to 68%)      |

Data whose Days Latitude are day 14 or below and NR are excluded from the meta-regression analysis

## S.5. Summary of outcomes for booster vs full dose of the within 3 months or more model

Table S6. Summary of outcomes for booster vs. full dose of the within 3 months or more model

| Authors                  | Outcomes              | Design       | Vaccine         | VED (95% CI)             |
|--------------------------|-----------------------|--------------|-----------------|--------------------------|
| Andrews et al., 2022     | Symptomatic Infection | Cohort       | ChAdOx1 nCov-19 | 16.11% (2.41 to 29.82%)  |
| Andrews et al., 2022     | Symptomatic Infection | Cohort       | BNT162b2        | 17.64% (16.24 to 19.05%) |
| Andrews et al., 2022     | Symptomatic Infection | Cohort       | mRNA-1273       | 16.52% (12.45 to 20.59%) |
| Buchan et al., 2021      | Symptomatic Infection | Case-control | Any mRNA        | 27.25% (-5.06 to 59.56%) |
| Chemaitelly et al., 2022 | Symptomatic Infection | Case-control | BNT162b2        | 0% (-6.08 to 6.08%)      |
| Chemaitelly et al., 2022 | Symptomatic Infection | Case-control | mRNA-1273       | 33% (-21.38 to 87.38%)   |
| Tartof et al., 2022      | Symptomatic Infection | Case-control | BNT162b2        | -5.72% (-19.59 to 8.15%) |
| Abu-Raddad et al., 2022  | Symptomatic Infection | Cohort       | BNT162b2        | -7.7% (-38.69 to 23.29%) |
| Abu-Raddad et al., 2022  | Symptomatic Infection | Cohort       | mRNA-1273       | 2% (-8.26 to 12.26%)     |
| Natarajan et al., 2022   | Symptomatic Infection | Case-control | Any mRNA        | 27.6% (19.15 to 36.06%)  |
| Klein et al., 2022       | symptomatic Infection | Case-control | BNT162b2        | 33% (23.82 to 42.18%)    |
| Ferdinand et al., 2022   | symptomatic Infection | Case-control | Any mRNA        | 19% (-2.97 to 40.97%)    |
| Buchan et al., 2021      | Severe infection      | Case-control | Any mRNA        | -3.1% (-6.29 to 0.09%)   |
| Lauring et al., 2022     | Severe infection      | Case-control | Any mRNA        | -3.5% (-6.45 to -0.55%)  |
| Tartof et al., 2022      | Severe infection      | Case-control | BNT162b2        | 42% (32 to 52%)          |
| Abu-Raddad et al., 2022  | Severe infection      | Cohort       | BNT162b2        | 50.6% (48.35 to 52.85%)  |
| Natarajan et al., 2022   | Severe infection      | Case-control | Any mRNA        | 23.5% (7.7 to 39.3%)     |
| Tenforde et al., 2022    | Severe infection      | Case-control | Any mRNA        | 52.7% (46.4 to 59%)      |
| Hansen et al., 2022      | Positive Covid-19     | Cohort       | BNT162b2        | 29% (18.95 to 39.05%)    |
| Tseng et al., 2022       | Positive Covid-19     | Case-control | mRNA-1273       | 17.5% (7.26 to 27.74%)   |
| Monge et al., 2022       | Positive Covid-19     | Case-control | mRNA-1273       | 15% (3.58 to 26.42%)     |
| Monge et al., 2022       | Positive Covid-19     | Case-control | BNT162b2        | 30% (12.93 to 47.07%)    |

## S.6. Summary of outcomes for booster vs full dose of the within 3 months model

Table S7. Summary of outcomes for booster vs. full dose of the within 3 months model

| Authors                  | Outcomes              | Design       | Vaccine         | VED (95%CI)                |
|--------------------------|-----------------------|--------------|-----------------|----------------------------|
| Abu-Raddad et al., 2022  | Symptomatic Infection | Cohort       | BNT162b2        | 50.6% (50.18% to 51.02%)   |
| Abu-Raddad et al., 2022  | Symptomatic Infection | Cohort       | mRNA-1273       | 52.7% (51.53% to 53.87%)   |
| Abu-Raddad et al., 2022  | Severe infection      | Cohort       | BNT162b2        | 23.5% (20.57% to 26.43%)   |
| Accorsi et al., 2022     | Symptomatic Infection | Case-control | BNT162b2        | 64.9% (64.34% to 65.46%)   |
| Accorsi et al., 2022     | Symptomatic Infection | Case-control | mRNA-1273       | 59.5% (58.81% to 60.19%)   |
| Andrews et al., 2022     | Symptomatic Infection | Cohort       | ChAdOx1 nCov-19 | 27.29% (16.16% to 38.43%)  |
| Andrews et al., 2022     | Symptomatic Infection | Cohort       | BNT162b2        | 28.15% (26.5% to 29.79%)   |
| Andrews et al., 2022     | Symptomatic Infection | Cohort       | mRNA-1273       | 33.96% (28.34% to 39.59%)  |
| Buchan et al., 2021      | Symptomatic Infection | Case-control | Any mRNA        | 35.85% (24.81% to 46.89%)  |
| Buchan et al., 2021      | Severe infection      | Case-control | Any mRNA        | 24.21% (-33.37% to 81.79%) |
| Chemaitelly et al., 2022 | Symptomatic Infection | Case-control | mRNA-1273       | 6% (-14.52% to 26.51%)     |
| Chemaitelly et al., 2022 | Symptomatic Infection | Case-control | BNT162b2        | 9.01% (-23.82% to 41.83%)  |
| Ferdinand et al., 2022   | symptomatic Infection | Case-control | Any mRNA        | 22.33% (16.9% to 27.77%)   |
| Hansen et al., 2022      | Positive Covid-19     | Cohort       | BNT162b2        | 78.54% (53.26% to 103.81%) |
| Klein et al., 2022       | symptomatic Infection | Case-control | BNT162b2        | 41.7% (21.43% to 61.98%)   |
| Lauring et al., 2022     | Severe infection      | Case-control | Any mRNA        | 2% (-4.88% to 8.88%)       |
| Natarajan et al., 2022   | Symptomatic Infection | Case-control | Any mRNA        | 29% (26.41% to 31.59%)     |
| Natarajan et al., 2022   | Severe infection      | Case-control | Any mRNA        | 17.5% (14.87% to 20.13%)   |
| Tartof et al., 2022      | Symptomatic Infection | Case-control | BNT162b2        | 33% (24.98% to 41.02%)     |
| Tartof et al., 2022      | Severe infection      | Case-control | BNT162b2        | 19% (-0.18% to 38.18%)     |
| Tenforde et al., 2022    | Severe infection      | Case-control | Any mRNA        | 15% (12.88% to 17.12%)     |
| Thompson et al., 2022    | Severe infection      | Case-control | Any mRNA        | 9% (-1.9% to 19.9%)        |

|                       |                   |              |           |                         |
|-----------------------|-------------------|--------------|-----------|-------------------------|
| Thompson et al., 2022 | Positive Covid-19 | Case-control | Any mRNA  | 30% (25.07% to 34.93%)  |
| Tseng et al., 2022    | severe infection  | Case-control | mRNA-1273 | 14.7% (7.49% to 21.91%) |
| Tseng et al., 2022    | Positive Covid-19 | Case-control | mRNA-1273 | 27.6% (20.4% to 34.8%)  |
| Yong-Xu et al., 2022  | Positive Covid-19 | Case-control | Any mRNA  | 21% (20.14% to 21.86%)  |



Figure S1. Sensitivity Analysis for Any Infection Endpoints of 0 to 3 Months Model

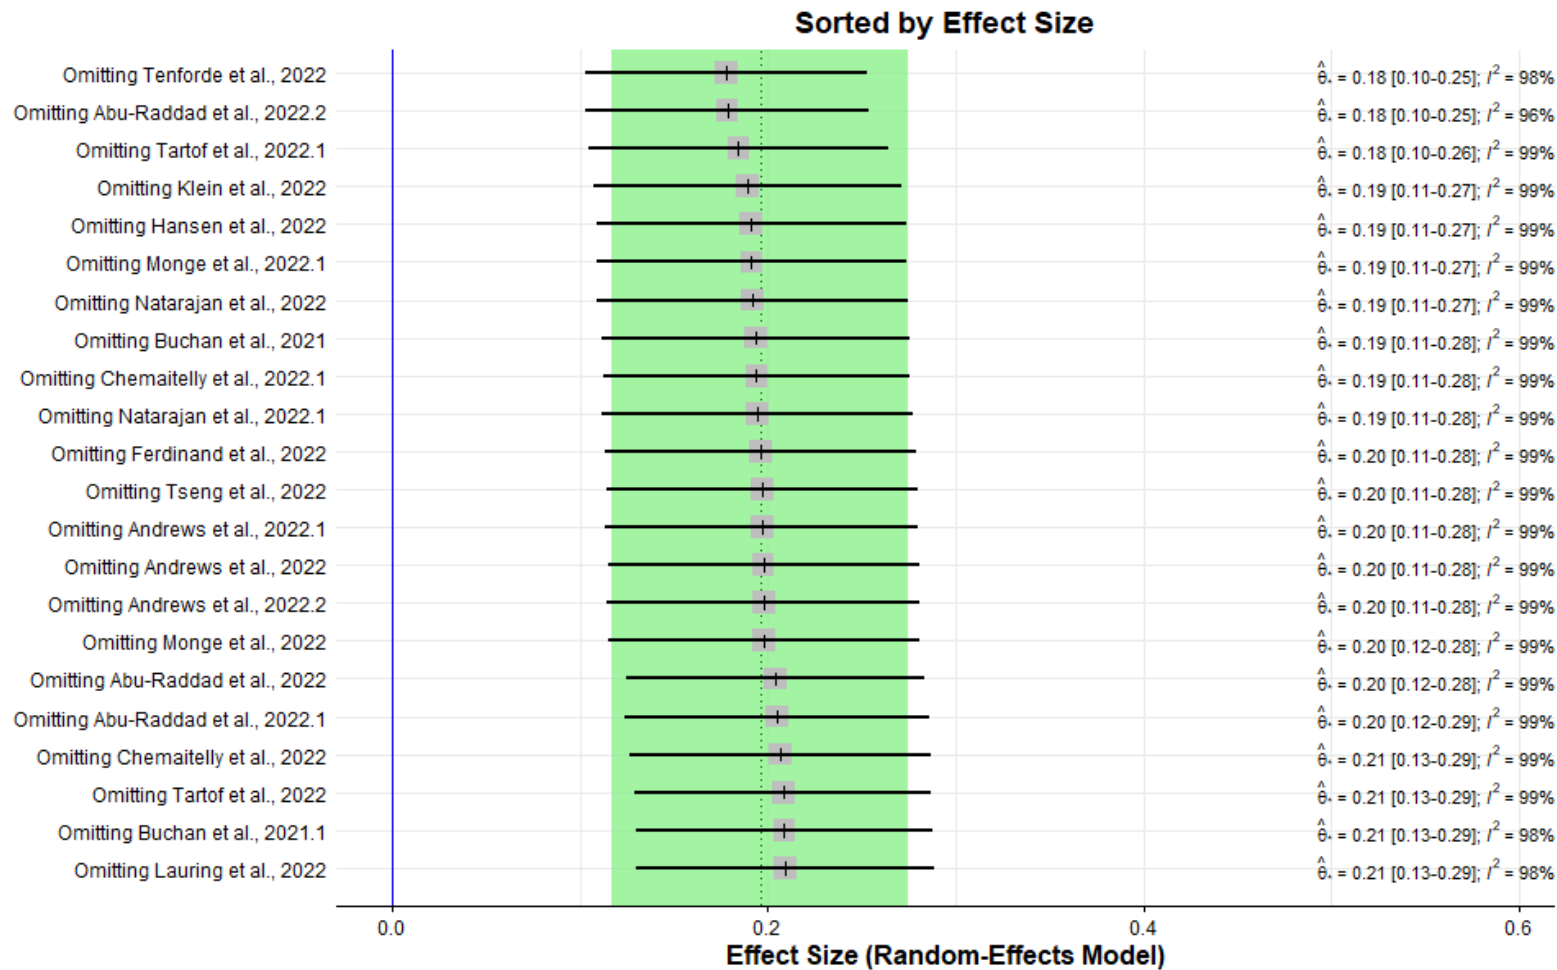

Figure S2. Sensitivity Analysis for Symptomatic Infection Endpoints of 0 to 3 Months Model

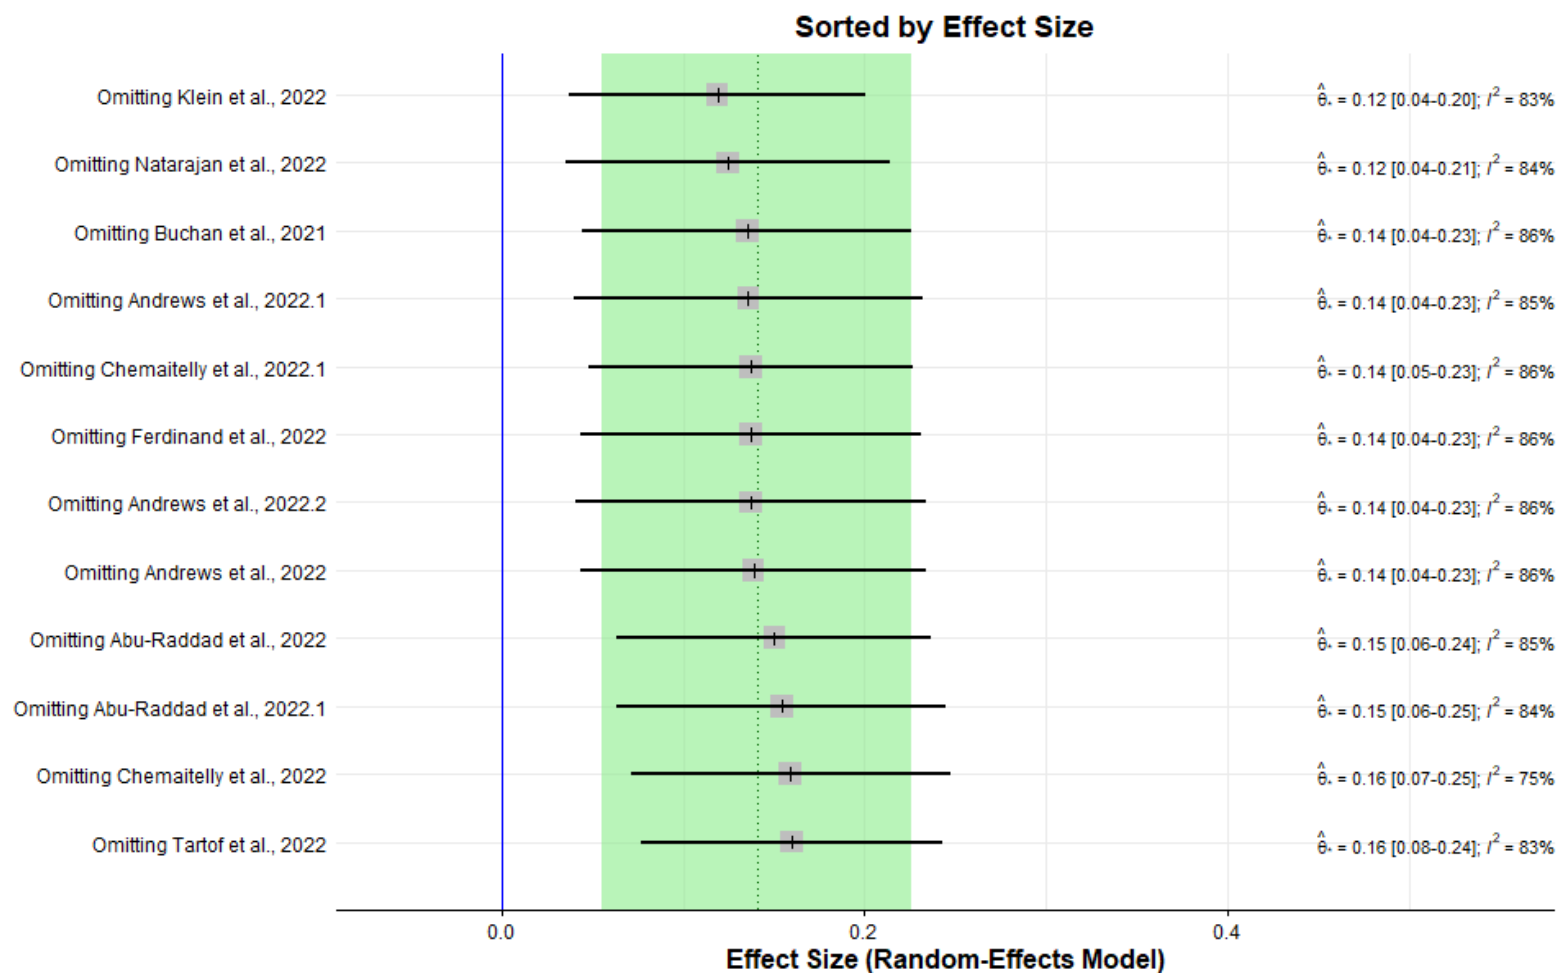

Figure S3. Sensitivity Analysis for Severe Infection Endpoints of 0 to 3 Months Model

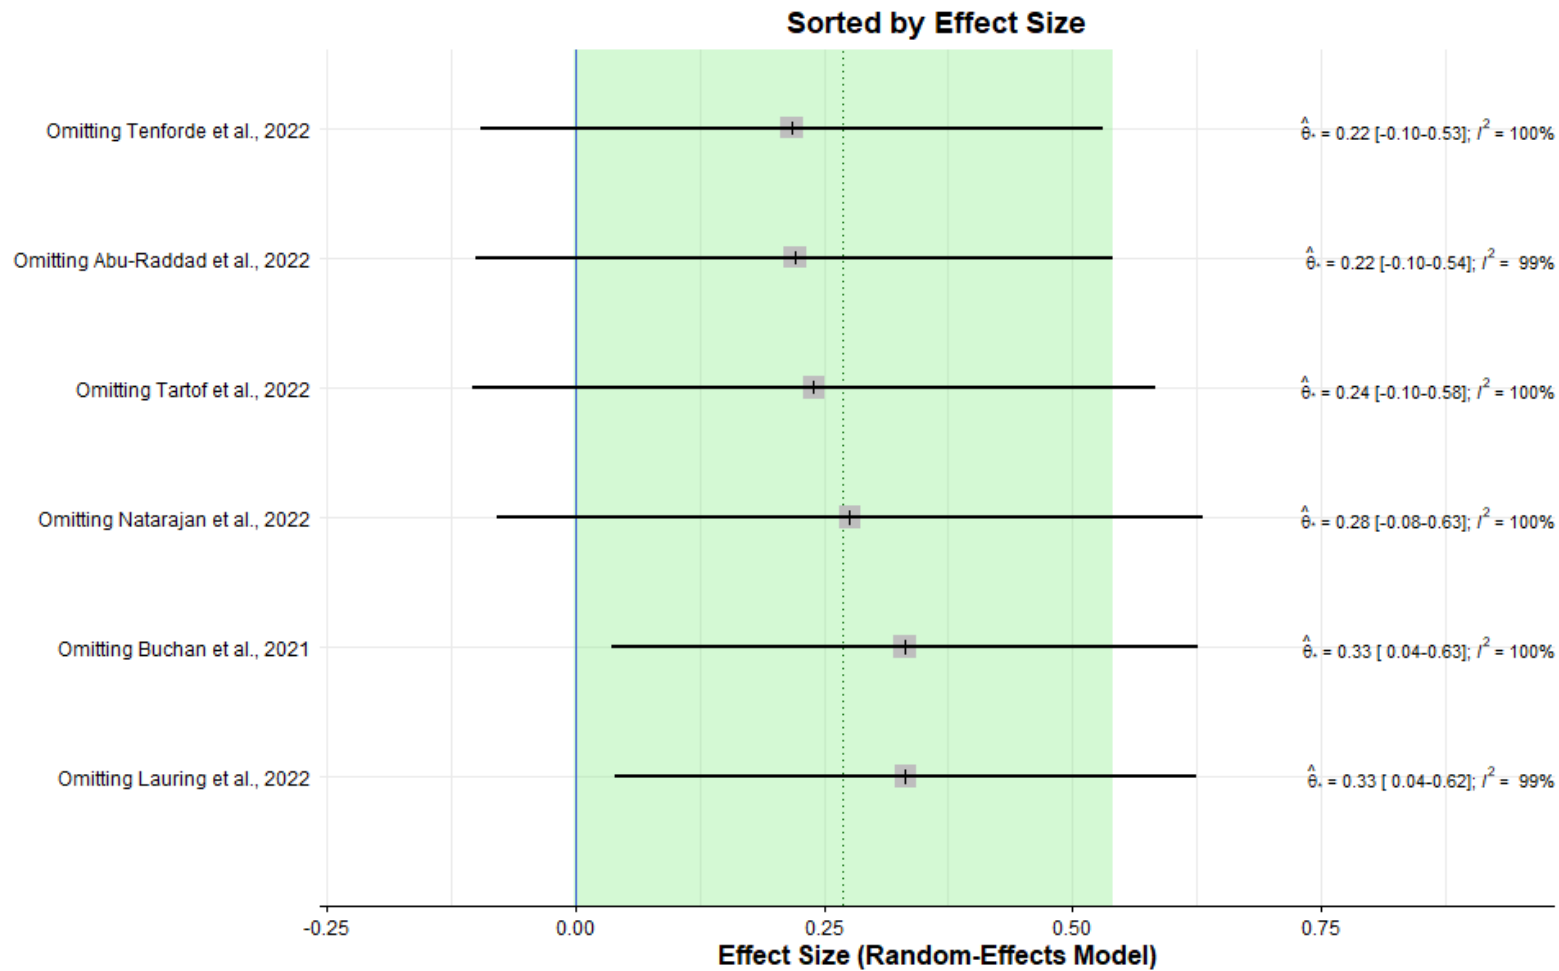

Figure S4. Sensitivity Analysis for Any Infection Endpoints of 0 to 3 Months or More Model

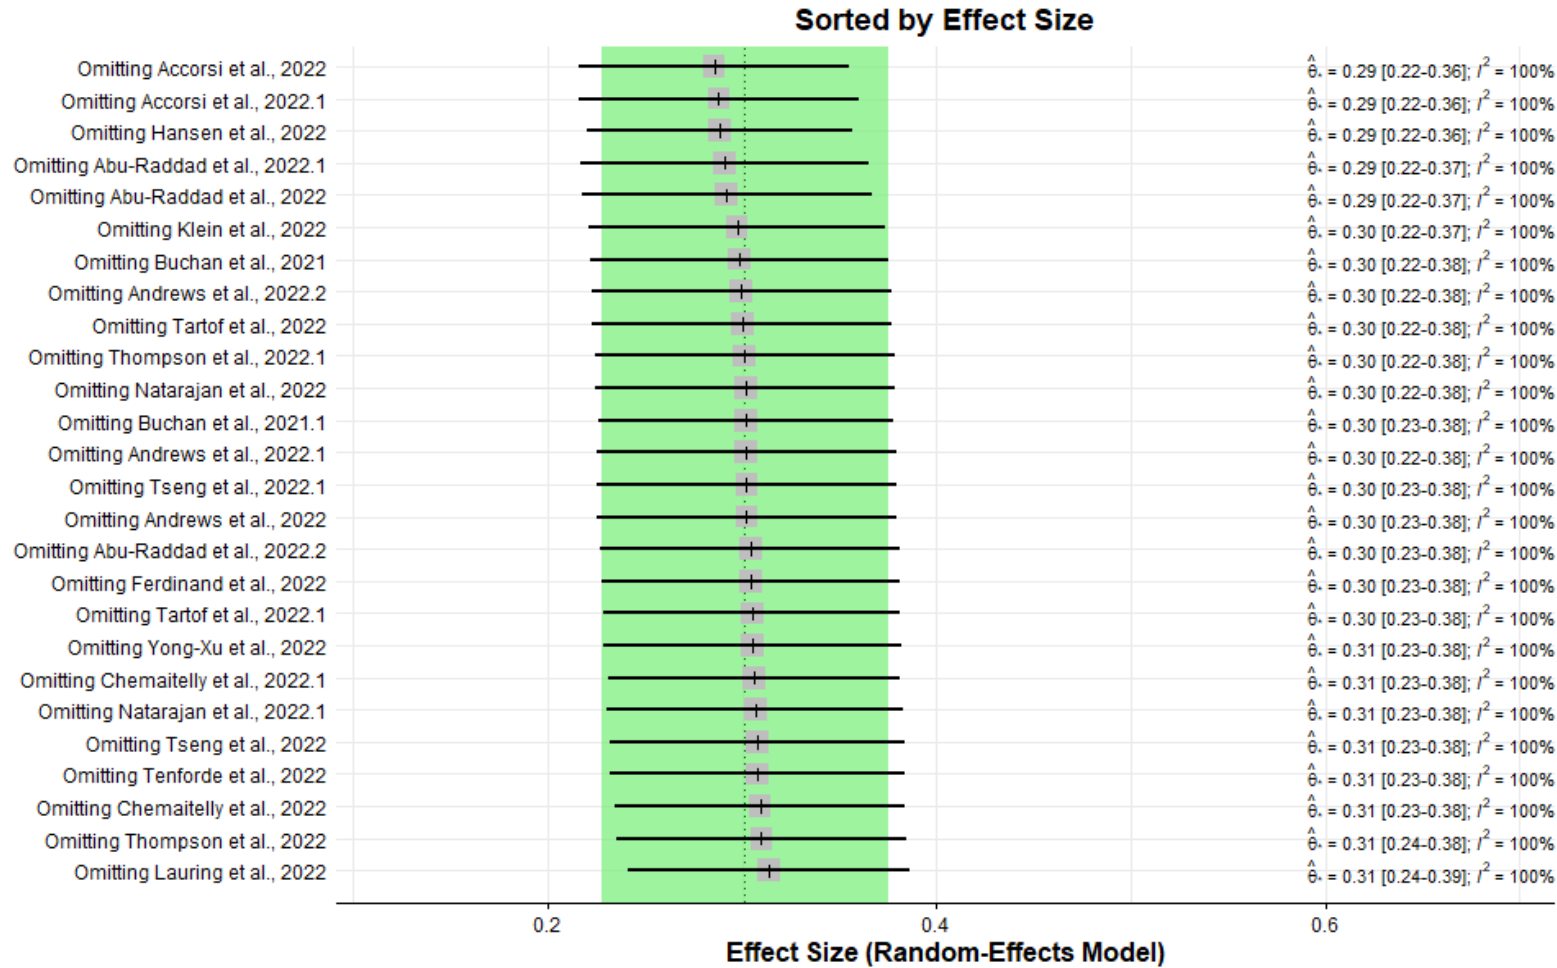

Figure S5. Sensitivity Analysis for Symptomatic Infection Endpoints of 0 to 3 Months or More Model

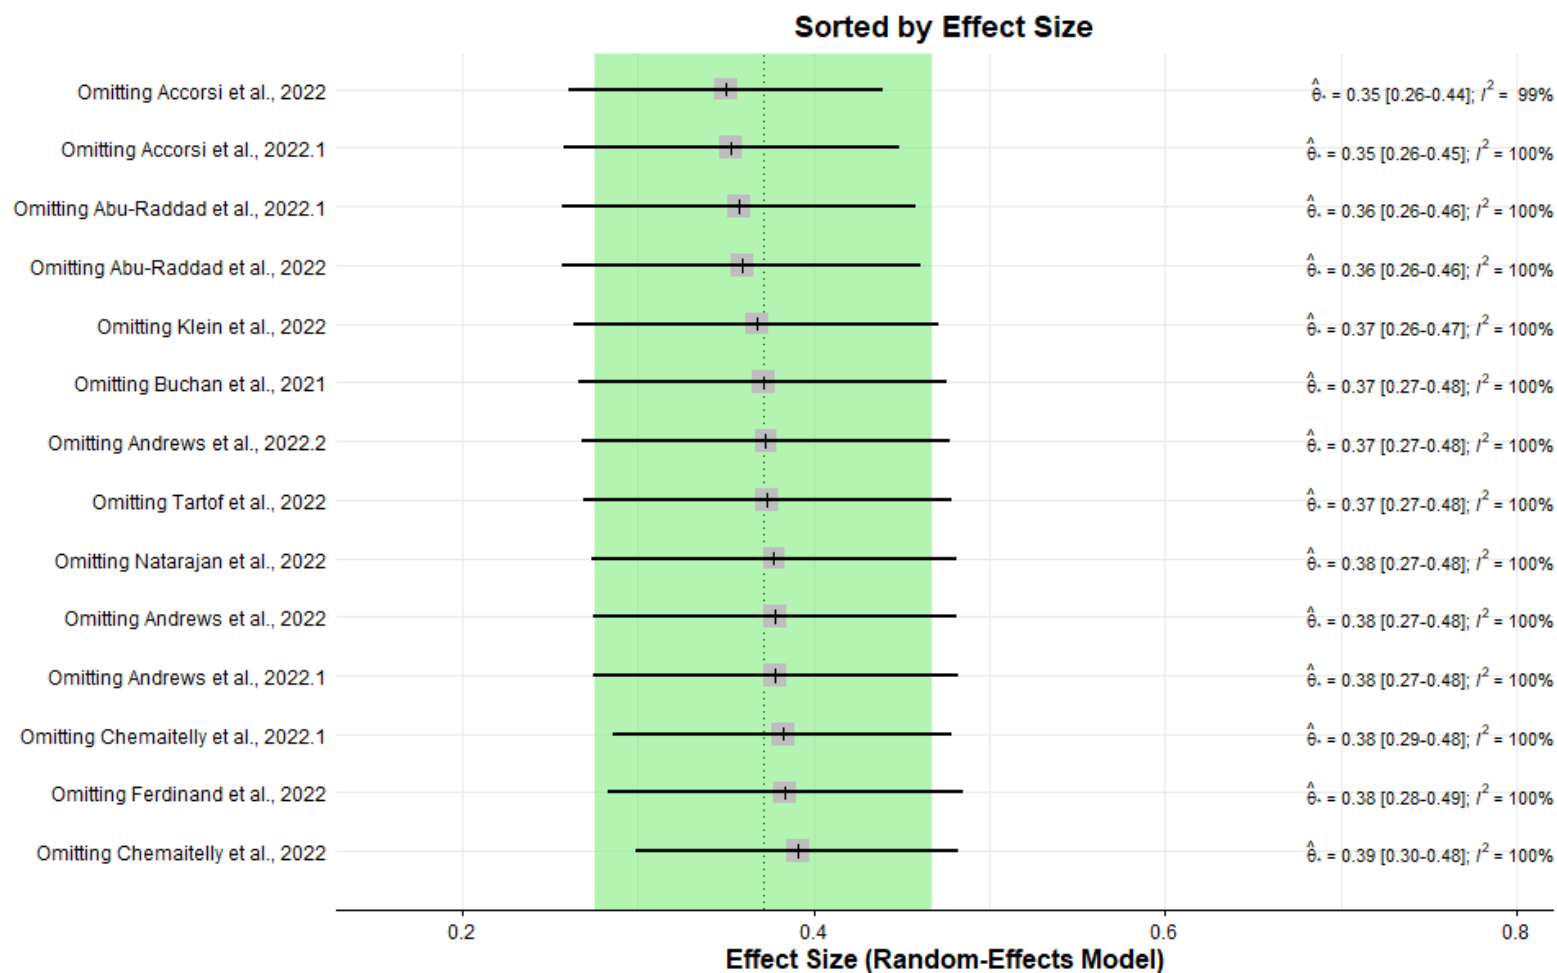

Figure S6. Sensitivity Analysis for Severe Infection Endpoints of 0 to 3 Months or More Model

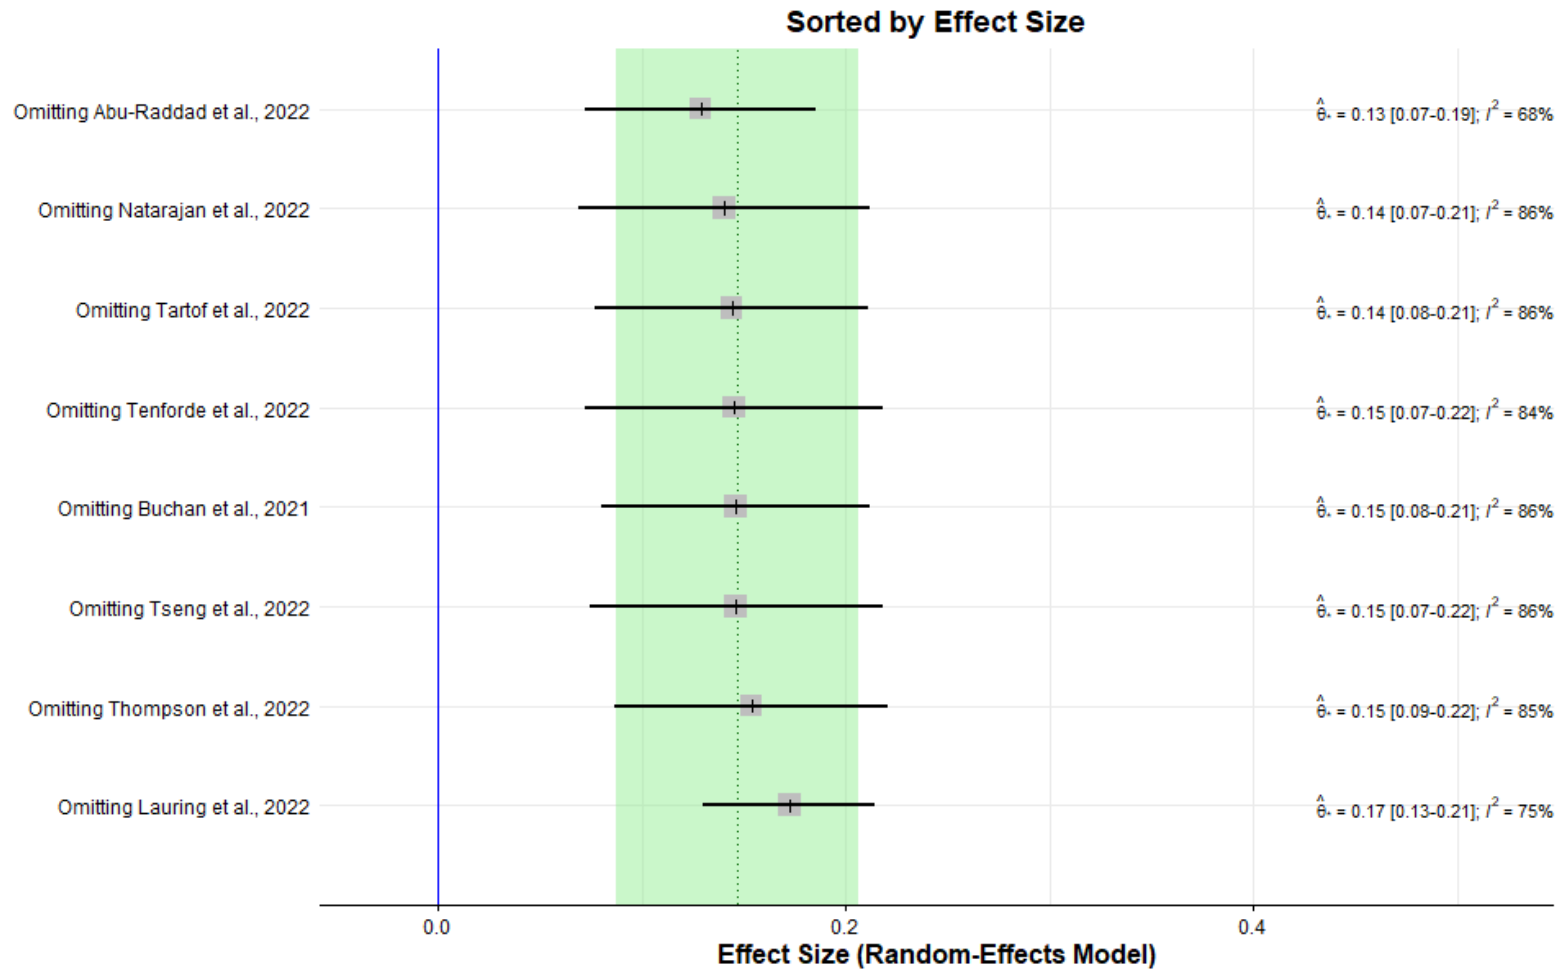

Supplement: s1 [file s1]
